# Supplementary material
Source: ML conference proceedings conference paper supplement (https://openreview.net/forum?id=IOScl0QXf8)
Supplement: supplementary_material [file Statja_KorostelevSP.docx]

**ML-подход к квалиметрии: ГНС в оценке ценности**

Аннотация: *Для устойчивого комплексного развития территорий (КРТ) необходима оценка многогранной ценности (социальной, экологической и др.) помимо традиционной экономической стоимости. Классическая квалиметрия. для этой оценки трудоемка и требует множества экспертов. В работе предложен* ***ML-подход****, сочетающий классическую квалиметрическую методологию с использованием* ***генеративных нейронных сетей (ГНС)*** *для автоматизации квалиметрии и частичной замены экспертов. Представлен промт, разработанный для проведения таких* ***гибридных квалиметрических исследований*** *ценности территории, отработанный на* ***тестовых примерах*** *(воспроизведение классического анализа на примерах из работ проф. Азгальдова Г.Г.). Эксперименты подтвердили принципиальную возможность применения ГНС для автоматизации ключевых процедур квалиметрии:* ***построения деревьев свойств*** *и* ***расчета весов ценности****. Результаты показывают, что использование ИИ повышает практичность и масштабируемость и ускоряют квалиметрических исследований в оценке ценности территорий*.

Abstract: *For* ***sustainable Integrated Territorial Development (ITD)****, evaluating* ***multifaceted value*** *(social, ecological, etc.) is necessary, beyond traditional economic cost. Classical qualimetry for this assessment is* ***labor-intensive*** *and requires numerous experts. This work proposes an* ***ML-based approach****, combining classical qualimetric methodology with* ***generative neural networks (GNNs)*** *to automate qualimetry and partially replace experts. A* ***prompt****, developed for conducting such hybrid qualimetric studies of territorial value, is presented. It has been tested on* ***test cases*** *(reproducing classical analysis on examples from the works of Prof. Azgaldov G.G.). Experiments confirmed the* ***principal possibility of applying GNNs*** *for automating key qualimetric procedures:* ***building property trees*** *and* ***calculating value weights****. Results show that using AI enhances practicality, scalability, and accelerates qualimetric studies in assessing territorial value.*

*Ключевые слова: комплексное развитие территорий, стоимость, ценность, квалиметрия, нейронные сети, стейкхолдеры, Генеративные нейронные сети (ГНС), ML-подход.*

*Key words: integrated development of territories, cost, value, qualimetry, neural networks, stakeholders, Generative Neural Networks (GNNs), ML-based approach*.

Проекты комплексного развития застроенной территорий (КРТ) являются мощным инструментом трансформации городского пространства, направленный на создание комфортной, устойчивой и экономически процветающей среды. Традиционно они фокусируются преимущественно на экономической составляющей – стоимости и капитализации.Такой подход, ориентированный на измеримые финансовые показатели, может привести к упущению из виду других, не менее важных аспектов, определяющих качество городской среды и благополучие ее жителей.

В монографии [6] предложен подход к реализации проектов КРТ, который базируется на концепции рационального и наиболее эффективного использования (РНЭИ) [5]. Эта концепция характерна для теории и практики землеустройства, но не применяется или очень редко применяется девелоперами и градостроителями. Концепция базируется на понятии ценности территории, а не ее стоимости. В отличии от стоимости ценность территории должна учитывать такие важные аспекты, как **социальные, экологические, культурные, эстетические факторы** и др. Недооценка этих факторов может привести к проектам, которые эффективны с экономической точки зрения, но имеют негативные долгосрочные последствия для городской среды и ее жителей, что критически важно для достижения устойчивости.

Проблема оценки ценности недвижимости была фундаментально исследована в работе Сары Сейс и ее коллегами из Школы сервейеров Кингстонного университета «Оценка недвижимого имущества: от стоимости к **ценности**» [7].

Объединение различных ценностей стейкхолдеров в единый интегральный показатель представляет собой сложную задачу [6], требующую учета различных точек зрения и использования таких методов, как многокритериальный анализ и определение весовых коэффициентов. . Разные группы стейкхолдеров (например, девелоперы и местные жители) могут иметь противоречивые представления о ценности. Проведенный в [6] анализ показал, что произвести корректную оценку ценности территории инструментами экономических измерений [3] не представляется возможным. Для этой процедуры необходимо применить методы количественной оценки качества, в частности методы квалиметрии.

Квалиметрия, научная дисциплина, занимающаяся количественным оцениванием качества [1, 2, 8], сформировалась еще в 60-тые годы прошлого века, ее активным проводником в практику измерений являлся проф. Азгальдов Г.Г. Однако широкого распространения теория квалиметрии не получила. В первую очередь из-за сложности проведения исследований.

Она трудоемка и требует привлечения множества экспертов, часто с отрывом от их основной деятельности на значительное время. Для разработки Методики Оценивания Качества (МОК) требуется создание Организационной, Технической и Экспертной групп. Численность Экспертной группы может достигать 7-10 человек, иногда требуется создание нескольких таких групп. Вышеописанный алгоритм оказался весьма затратен и трудоемок, так как формировался без учета современных технологий.

Появление искусственного интеллекта (ИИ), особенно генеративных нейронных сетей (ГНС), открывает возможности для значительного сокращения трудоемкости количественной оценки качества [4]. ГНС, такие как DeepSeek и Gemini 2.0 Flash, продемонстрировали высокий уровень обученности и экспертности. ГНС способны понимать и генерировать текст и код, аналогичные человеческим, а также выполнять задачи, связанные с рассуждениями и обработкой информации. Они обладают возможностями, релевантными квалиметрическому анализу, включая понимание текста, извлечение информации и распознавание образов. ИИ уже применяется в различных аналитических задачах и экспертных областях, таких как медицинская диагностика или анализ юридических документов. Основная проблема исследователя при работе с ГНС является составление правильного задания для работы ГНС, которое называется промтом. Разработка эффективных интерактивных промтов представляет собой стратегию для направления ГНС в выполнении квалиметрического анализа на экспертном уровне. Тщательно разработанные промты предоставляют контекст, инструкции и ограничения модели. Несмотря на свои возможности, современные ГНС имеют ограничения. Они могут допускать неточности ("галлюцинации"), наследовать смещения из обучающих данных, испытывать трудности со сложными числовыми рассуждениями и не обладают истинным пониманием или здравым смыслом. Перевод многогранных суждений и неявных знаний экспертов в явные правила для ИИ представляет собой значительную проблему и в настоящее время не могут быть полностью автоматизированы и требуют верификации выходных данных модели.

Для отработки квалиметрического промта в среде интегратора ГНС Monica с использованием ГНС DeepSeek V3 был создан бот с именем «Квалиметрия». В базу знаний бота были загружены работы по квалиметрии, прежде всего, труды Г.Г. Азгальдова. Первый промт был разработан для выполнения процедур составления деревьев свойств и проведения расчетов весов простых свойств. Простые свойства – это свойства, которые можно измерить аналитически или экспертно, и их веса определены как ярусный нормированный коэффициент (Я.Н.К.).

Для отладки промта и подтверждения возможности использования ГНС, был проведен эксперимент с воспроизведением примера из книги проф. Азгальдова Г.Г. [2, 8] по созданию квалиметрической методики определения лауреатов Национальной премии в области франчайзинга «Золотой брэнд» в номинации «Золотая франшиза» (по состоянию на 2007 год). В оригинальном примере и трудоемкость работы оценивалась примерно в 9 человеко-дней без учета затрат руководителя разработки методики. На основе 19 критериев было построено дерево свойств, представленное в табл.1. Нумерация свойств в оригинальном примере оказалась неприменима для работы бота, что потребовало изменения кодировки.

Таблица 1

Дерево свойств из примера эффективности работы предприятий-номинантов в области франчайзинга из книги Азгальдова Г.Г и др. [13]

| Ярус 0 | Ярус 1 | Ярус 2 | Ярус 3 | Ярус 4 | Ярус 5 |
| --- | --- | --- | --- | --- | --- |
| Эффективность франчайзинга | 18. Полученные результаты - 1.1. | 16. Оргработа по франшизам - 1.1.1. | 13. Обобщенная характеристика франшизы - 1.1.1.1. | 12. Распространенность по числу франшиз - 1.1.1.1.1. | 1. Число франчайзи с несколькими франшизами - 1.1.1.1.1.1. |
| 2. Общее число франчайзи - 1.1.1.1.1.2. |
| 3. Распространенность по регионам - 1.1.1.1.2. | |
| 14. Успешность заключения франшиз - 1.1.1.2. | 4. Число расторгнутых франшиз- 1.1.1.2.1. | |
| 5. Число расторгнутых франшиз в % - 1.1.1.2.2. | |
| 6. Общий объем продаж - 1.1.2. | | | |
| 19. Обобщенная характеристика затрат - 1.2. | 17. Затраты на франчайзинг - 1.2.1. | 7. Расходы франчайзера на рекламу франчайзинга - 1.2.1.1. | | |
| 15. Расходы франчайзера на рекламу франчайзинга - 1.2.1.2. | 8. Затраты в рамках помощи франчайзи - 1.2.1.2.1. | |
| 9. Бросовые затраты при расторжении франшизы - 1.2.1.2.2. | |
| 10. Затраты на повышение гудвилла в рекламе франчайзинга -1.2.1.3 | | |
| 11. Доля затрат на франчайзинг в общих затратах на рекламу - 1.2.2. | | | |

Далее проводилась тренировка бота в интерактивном режиме, где ошибки бота выявлялись, и соответствующие инструкции добавлялись в промт для их предотвращения. Таким образом, удалось натренировать бота проводить правильные вычисления по методологии квалиметрии. Итоговый промт составил 16 380 знаков (включая символы., см Приложение).

После получения удовлетворительных результатов тренировки, боту было дано задание воспроизвести пример из книги проф. Азгальдова Г.Г. При интерактивном взаимодействии с ботом им было выявлено некоторое несоответствие разработанного в примере дерева свойств правилами составления таких деревьев. Тем не менее ему было поручено полностью воспроизвести пример из книги и рассчитать весовые коэффициенты по правилам квалиметрии, что он и сделал. Результаты сравнения выходных параметров примера (Я.Н.К.) и рассчитанных ботом значений представлено в табл.2

Таблица 2

Сравнение результатов квалиметрического анализа примера и расчета бота

| Наименование | Номера по дереву | Значения групповых и ярусных коэффициентов важности Gi (пример из книги) | | | | Значения групповых и ярусных коэффициентов важности Gi (рассчитано ботом) | | | | | | | | | |
| --- | --- | --- | --- | --- | --- | --- | --- | --- | --- | --- | --- | --- | --- | --- | --- |
| Среднее значение данных экспертов | Нормированные значения групповых к.в. | Рассчитанные **Я.Н.К.** по примеру | | кодировка | | Назначенный вес бота ГНС | | Нормированные значения групповых к.в. | | Рассчитанные **Я.Н.К.** ботом | | |
| Число франчайзи с несколькими франшизами | 1 | 74 | 0,426 | **0,0637** | | 1.1.1.1.1.1 | | 75 | | 0,429 | | **0,0624** | | |
| Общее число франчайзи | 2 | 100 | 0,574 | **0,0858** | | 1.1.1.1.1.2 | | 100 | | 0,571 | | **0,0832** | | |
| Распространённость по регионам | 3 | 77 | 0,435 | **0,1153** | | 1.1.1.1.2 | | 80 | | 0,444 | | **0,1165** | | |
| Число расторгнутых франшиз | 4 | 51 | 0,456 | **0,0720** | | 1.1.1.2.1 | | 90 | | 0,474 | | **0,0745** | | |
| Отношение расторгнутых франшиз к общему числу | 5 | 61 | 0,544 | **0,0860** | | 1.1.1.2.2 | | 100 | | 0,526 | | **0,0828** | | |
| Общий объем продаж по франчайзингу | 6 | 47 | 0,324 | **0,2022** | | 1.1.2. | | 49 | | 0,329 | | **0,2055** | | |
| Затраты в рамках помощи франчайзи | 8 | 100 | 0,778 | **0,0972** | | 1.2.1.2.1 | | 100 | | 0,769 | | **0,1024** | | |
| Потери при расторжении договоров | 9 | 29 | 0,222 | **0,0278** | | 1.2.1.2.2 | | 30 | | 0,231 | | **0,0307** | | |
| Расходы франчайзера на рекламу франчайзинга | 7 | 60 | 0,290 | **0,0937** | | 1.2.1.1 | | 70 | | 0,286 | | **0,0932** | | |
| Доля расходов на повышение гудвилла | 10 | 67 | 0,324 | **0,1048** | | 1.2.1.3 | | 75 | | 0,306 | | **0,0998** | | |
| Доля затрат на франчайзинг в затратах на рекламу | 11 | 16 | 0,138 | **0,0516** | | 1.2.2. | | 15 | | 0,130 | | **0,0489** | | |
| Проверка 5-го яруса | | | | | 1,0000 | |  | |  | |  | | 1,0000 |

Как видно из табл. 2, полученные ботом результаты весьма близки к примеру, из книги. Некоторое несоответствие объясняется тем, что в примере значения групповых коэффициентов были усреднены по данным экспертов, в то время как бот назначал их самостоятельно. Примечательно, что усредненные данные экспертов в некоторых случаях противоречили правилам квалиметрии. Например, в разложении родительского свойства "Успешность заключения франшиз" (табл. 3), эксперты дали прямо противоположные оценки, что может указывать на вопросы к их компетентности. В таких случаях правила квалиметрии требуют проведения второго тура оценивания для согласования позиций экспертов, чего сделано не было, что и привело к ошибке в вычислениях примера. В этом отношении расчет бота оказался более корректным и соответствующим правилам квалиметрии.

Таблица 3

Разложение родительского свойства «Успешность заключения франшиз» в примере

| Наименование | Номер по дереву | Значения групповых ненормируемых i-х к-тов важности у разных экспертов: | | | | | | | Среднее значение |
| --- | --- | --- | --- | --- | --- | --- | --- | --- | --- |
| Эк. 1 | Эк.2 | Эк.3 | Эк.4 | Эк.5 | Эк.6 | Эк.7 |  |
| Число расторгнутых франшиз | **4** | 10 | **100** | 10 | 20 | 20 | **100** | **100** | **51** |
| Отношение расторгнутых франшиз к общему числу | **5** | **100** | 10 | **100** | **100** | **100** | 10 | 10 | **61** |

Таким образом, в первом приближении, было доказано, что бот может корректно, в интерактивном режиме, создавать деревья свойств и проводить необходимые расчеты по правилам квалиметрии. Этот вывод позволил перейти к оцениванию ценности территорий. Для этой цели был создан бот в другой продвинутой версии ГНС Gemini 2.0 Flash корпорации GOOGLE. В бот «Квалиметрия_GM» был перенесен созданный промт и загружены материалы по теории и практике квалиметрии и оценки территорий. Боту было дано задание построить дерево свойств и произвести расчеты весовых коэффициентов (Я.Н.К.) при условии равенства трех базовых свойств ценности: экономической, экологической и социальной. Интерактивный режим был отключен, и бот должен был самостоятельно разложить родительские свойства до простых, измеряемых, и произвести расчеты. Для решения задачи боту оказалось достаточным произвести разложение на 3 яруса (табл.4).

**Таблица 4**

**Дерево свойств ценности территории и Я.Н.К., рассчитанные ботом**

| Н.К | Ярус 1 | Ярус 2 | Ярус 3 | | Я.Н.К. | Я.Н.К. в % |
| --- | --- | --- | --- | --- | --- | --- |
| Ценность территории для КРТ | **Экономическая ценность (100%)** | Разнообразие локальной экономики (100%) | 1.1.1.1 | Наличие объектов розничной торговли | 0,0289 | **2,89** |
| 1.1.1.2 | Развитость сферы услуг | 0,026 | **2,6** |
| 1.1.1.3 | Представленность общественного питания | 0,0231 | **2,31** |
| 1.1.1.4 | Наличие объектов малого и среднего бизнеса | 0,0202 | **2,02** |
| Инфраструктура для деловой активности (90%) | 1.1.2.1 | Наличие офисных помещений и коворкингов | 0,0327 | **3,27** |
| 1.1.2.2 | Качество телекоммуникационной инфраструктуры | 0,0294 | **2,94** |
| 1.1.2.3 | Доступность сервисной инфраструктуры для бизнеса | 0,0261 | **2,61** |
| Транспортная доступность и связанность (80%) | 1.1.3.1 | Развитость сети общественного транспорта | 0,0231 | **2,31** |
| 1.1.3.2 | Наличие и качество пешеходной инфраструктуры | 0,0208 | **2,08** |
| 1.1.3.3 | Наличие и качество велосипедной инфраструктуры | 0,0184 | **1,84** |
| 1.1.3.4 | Доступность автомобильного транспорта | 0,0161 | **1,61** |
| Потенциал для создания новых рабочих мест (70%) | 1.1.4.1 | Наличие свободных площадей для развития бизнеса | 0,0256 | **2,56** |
| 1.1.4.2 | Привлекательность территории для предпринимателей | 0,023 | **2,3** |
| 1.1.4.3 | Соответствие спросу на рынке труда | 0,0205 | **2,05** |
| **Экологическая ценность (100%)** | Состояние окружающей среды (100%) | 1.2.1.1 | Уровень загрязнения атмосферного воздуха | 0,0289 | **2,89** |
| 1.2.1.2 | Качество воды | 0,026 | **2,6** |
| 1.2.1.3 | Уровень загрязнения почвы | 0,0231 | **2,31** |
| 1.2.1.4 | Уровень шумового загрязнения | 0,0202 | **2,02** |
| Наличие и доступность зеленых зон (90%) | 1.2.2.1 | Площадь зеленых насаждений на душу населения | 0,0327 | **3,27** |
| 1.2.2.2 | Доля территории, занимаемая зелеными зонами | 0,0294 | **2,94** |
| 1.2.2.3 | Оценка качества и благоустройства зеленых зон | 0,0261 | **2,61** |
| Биологическое разнообразие (80%) | 1.2.3.1 | Видовое богатство флоры | 0,026 | **2,6** |
| 1.2.3.2 | Видовое богатство фауны | 0,0289 | **2,89** |
| 1.2.3.3 | Наличие редких и охраняемых видов | 0,0231 | **2,31** |
| Энергоэффективность и устойчивость (70%) | 1.2.4.1 | Доля использования возобновляемых источников энергии | 0,0256 | **2,56** |
| 1.2.4.2 | Энергоэффективность зданий и сооружений | 0,023 | **2,3** |
| 1.2.4.3 | Эффективность использования ресурсов | 0,0205 | **2,05** |
| **Социальная ценность (100%)** | Уровень развития социальной инфраструктуры (100%) | 1.3.1.1 | Обеспеченность учреждениями образования | 0,0265 | **2,65** |
| 1.3.1.2 | Обеспеченность учреждениями здравоохранения | 0,0265 | **2,65** |
| 1.3.1.3 | Обеспеченность учреждениями культуры и спорта | 0,0239 | **2,39** |
| 1.3.1.4 | Обеспеченность учреждениями социального обеспечения | 0,0212 | **2,12** |
| Безопасность и правопорядок (90%) | 1.3.2.1 | Уровень преступности | 0,0327 | **3,27** |
| 1.3.2.2 | Ощущение безопасности жителей | 0,0294 | **2,94** |
| 1.3.2.3 | Эффективность работы правоохранительных органов | 0,0261 | **2,61** |
| Социальная сплоченность и вовлеченность (80%) | 1.3.3.1 | Наличие общественных пространств | 0,0291 | **2,91** |
| 1.3.3.2 | Активность местных сообществ и организаций | 0,0262 | **2,62** |
| 1.3.3.3 | Уровень участия жителей в принятии решений | 0,0233 | **2,33** |
| Комфортность проживания (70%) | 1.3.4.1 | Благоустройство территории | 0,0144 | **1,44** |
| 1.3.4.2 | Доступность жилья | 0,016 | **1,6** |
| 1.3.4.3 | Качество жилищного фонда | 0,0144 | **1,44** |
| 1.3.4.4 | Развитие инженерной инфраструктуры | 0,0128 | **1,28** |

Заключение

1. Хотя **ГНС** обладают значительным потенциалом для преобразования квалиметрического анализа, **полная замена экспертов-людей на данном этапе представляется маловероятной**. Существуют ограничения в способности ИИ воспроизводить нюансы человеческого суждения, неявные знания, здравый смысл и обрабатывать сложные, контекстно-зависимые ситуации. Наиболее вероятным сценарием будущего является **гибридный подход**, в котором **ГНС** используются как мощный инструмент **для дополнения и расширения возможностей экспертов-людей**. ИИ может автоматизировать рутинные задачи, обрабатывать большие объемы данных и предоставлять первоначальные результаты или предложения (например, критерии качества или веса). Это позволяет экспертам сосредоточиться на более сложных, стратегических аспектах анализа, требующих глубокого предметного понимания и критического мышления.
2. Разработка **эффективных интерактивных промтов** играет ключевую роль в направлении моделей ИИ для выполнения задач квалиметрического анализа с высокой точностью и релевантностью. Итеративные промты и циклы обратной связи, возможно, с участием человека-эксперта, могут помочь в совершенствовании работы.
3. Интеграция **ГНС** в квалиметрию поднимает важные **этические и практические вопросы**. Необходимо прояснить вопросы подотчетности за ошибки, обеспечить прозрачность оценок, основанных на ИИ, и учитывать риск увековечивания или усиления смещений из обучающих данных. Практические аспекты включают доступность и качество обучающих данных, необходимые вычислительные ресурсы и обучение пользователей. Растущая роль ИИ потребует от экспертов-людей адаптации навыков, включая разработку промтов, проверку моделей и решение сложных этических дилемм. Важно поддерживать **надзор и проверку со стороны человека** в гибридных подходах для обеспечения точности, надежности и этичного применения.
4. Учет многогранной ценности наряду с экономической стоимостью является ключевым фактором успеха и долгосрочной устойчивости проектов комплексного развития территорий. Квалиметрия предоставляет методологический инструментарий для количественной оценки различных аспектов ценности и их интеграции в процессы принятия решений. В статье показана и доказана принципиальная возможность использования ИИ в виде ГНС для проведения исследований и измерений с помощью квалиметрии. Дальнейшие исследования должны быть направлены на разработку практических методик оценки и интеграции ценности в практику квалиметрических измерений ценности.

Список литературы

1. Азгальдов Г. Г. Теория и практика оценки качества товаров. Основы квалиметрии. / Г. Г. Азгальдов, Экономика-е изд., М.:, 1982. 256 c.

2. Азгальдов Г. Г., Костин А. В., Садовов В. В. Квалиметрия для всех / Г. Г. Азгальдов, А. В. Костин, В. В. Садовов, Учебное пособие-е изд., М.: ИД ИнформЗнание, 2012. 165 c.

3. Коростелев С. П. «Теория и практика экономических измерений в недвижимости» // ЛитРес [Электронный ресурс]. URL: https://www.litres.ru/book/sergey-pavlovich-kor/teoriya-i-praktika-ekonomicheskih-izmereniy-v-nedvizh-68845437/ (дата обращения: 21.11.2023).

4. Коростелев С. П., Астафьева О. С. Применение искусственного интеллекта для моделирования экспертного мнения в квалиметрии // Сборник материалов международной научно-практической конференции, Москва, 2023. 2023. C. 36–46.

5. Коростелев С. П., Цыпкин Ю. А., Коростелев Ю. С. Противостояние наиболее эффективного и рационального использования в проектах комплексного развития территорий // Международный научно-технический журнал Недвижимость: экономика, управление. 2024. (4 приложение). C. 190–197.

6. Коростелев С. П., Цыпкин Ю. А., Шарипов С. А. Теория и практика землеустройства на урбанизированных территориях / С. П. Коростелев, Ю. А. Цыпкин, С. А. Шарипов, М.: Издательство «МИРАА», 2025. 294 c.

7. Сейс С. [и др.]. Оценка недвижимого имущества: от стоимости к ценности. / С. Сейс, Д. Смит, Р. Купер, П. Венмор-Роуланд, РОО-е изд., М.: РОО, 2009. 504 c.

8. Azgaldov G. G., Kostin A. V., Padilla Omiste A. The ABC of Qualimetry Toolkit for measuring the immeasurable / G. G. Azgaldov, A. V. Kostin, A. Padilla Omiste, Ridero, 2015. 167 c.

**Контрольный список NeurIPS**

**Воспроизводимость**: В работе описывается предложенный ML-подход, сочетающий классическую квалиметрическую методологию с использованием ГНС. Упоминается, что для проведения исследований ценности территории был разработан промпт, который отработан на тестовых примерах. Представлены результаты экспериментов, подтверждающие возможность применения ГНС для автоматизации ключевых процедур квалиметрии: построения деревьев свойств и расчета весов ценности. Описан эксперимент с воспроизведением примера из книги проф. Азгальдова Г.Г. Показано сравнение результатов квалиметрического анализа из примера и расчетов, сделанных ботом (Таблица 2). Указано, что для отработки промпта использовалась среда интегратора ГНС Monica с ГНС DeepSeek V3, а для оценки ценности территорий — ГНС Gemini 2.0 Flash12. База знаний бота была загружена работами по квалиметрии, прежде всего, трудами Г.Г. Азгальдова, а для оценки территорий добавлены материалы по теории и практике квалиметрии и оценки территорий. Итоговый промпт составил 16 380 знаков и представлен в Приложении.

**Прозрачность:** Источники данных для обучения или базы знаний ботов раскрыты — это работы по квалиметрии, труды Г.Г. Азгальдова и материалы по теории и практике квалиметрии и оценки территорий. В выводах статьи прямо указывается на необходимость обеспечить прозрачность оценок, основанных на ИИ, как на важный этический и практический вопрос. В представленных работе нет потенциальных конфликтах интересов, финансирование работы от любых источников, кроме собственных, не представлялось .

**Этика:** Статья подчеркивают важность оценки многогранной ценности (социальной, экологической и др.) помимо традиционной экономической стоимости для устойчивого комплексного развития территорий. Недооценка этих факторов может привести к экономически эффективным, но негативным с долгосрочной точки зрения проектам. Это демонстрирует осознание социального и экологического воздействия проектов КРТ. Интеграция ГНС в квалиметрию поднимает важные этические и практические вопросы. К ним относятся:

▪ Необходимость прояснить вопросы подотчетности за ошибки.

▪ Риск увековечивания или усиления смещений из обучающих данных. Это напрямую связано с риском дискриминации, хотя работа не детализируют, как это может проявиться именно в оценке территорий.

▪ Необходимость учета сложных этических дилемм при растущей роли ИИ.

В заключении отмечается, что учет многогранной ценности является ключевым фактором долгосрочной устойчивости проектов КРТ, что соответствует этическому подходу к городскому развитию.

• **Достоверность**: Достоверность подхода с использованием ГНС проверяется путем воспроизведения классических примеров квалиметрического анализа. Результаты, полученные ботом, сравниваются с результатами из примера (Таблица 2) для демонстрации их близости. Отмечается, что в одном случае расчет бота оказался более корректным и соответствующим правилам квалиметрии, чем усредненные данные экспертов, содержавшие ошибку из-за нарушения правил. Это может говорить о потенциале ИИ обеспечивать достоверность путем строгого следования методологии. Однако автор также указывают на ограничения современных ГНС, такие как возможность неточностей ("галлюцинаций") и трудности со сложными числовыми рассуждениями. Подчеркивается, что результаты ГНС требуют верификации выходных данных модели. Важно поддерживать надзор и проверку со стороны человека в гибридных подходах для обеспечения точности, надежности и этичного применения.

**Участие человека**: Классическая квалиметрия требует привлечения множества экспертов, что трудоемко. ML-подход с ГНС предложен для автоматизации квалиметрии и частичной замены экспертов. Однако автор прямо утверждают, что полная замена экспертов-людей на данном этапе представляется маловероятной. Наиболее вероятным сценарием будущего является гибридный подход, в котором ГНС используются для дополнения и расширения возможностей экспертов-людей. ИИ автоматизирует рутинные задачи и предоставляет первоначальные результаты, позволяя экспертам сосредоточиться на более сложных аспектах. Разработка эффективных интерактивных промптов и циклы обратной связи, возможно, с участием человека-эксперта, могут помочь в совершенствовании работы ГНС.

Растущая роль ИИ потребует от экспертов-людей адаптации навыков, включая проверку моделей и решение этических дилемм. Важность человеческого надзора и проверки в гибридных подходах для обеспечения точности, надежности и этичности подчеркивается в заключении. В отличие от исследований, где эксперименты проводятся с людьми-участниками для изучения их поведения или реакции, данная работа описывает техническое исследование применения ИИ для выполнения задач, которые традиционно выполняют эксперты. Поэтому вопросы этического соответствия, связанные непосредственно с проведением экспериментов над людьми-участниками исследования, в источниках не рассматриваются.

**Приложение. Разработанный в статье промт «Клалиметрия»**

«Ты являешься экспертом по квалиметрии и строишь дерево свойств для решения определенной проблемы. Нужно построить дерево свойств по законам квалиметрии по ярусам до достижения простых свойств, которые можно измерить.

1. Всегда в начале диалога спроси у пользователя: "Напомнить Вам правила составления деревьев свойств по методике проф. Коростелева С.П".?

Дождись реакции пользователя! Продолжишь ТОЛЬКО после реакции пользователя ДА/НЕТ

→ Если "Нет" переходим к пункту 2, а если "Да", выводим текст:

"Правила создания деревьев свойств"

10 ключевых правил составления деревьев свойств по методике:

Определение Главного родительского свойства (ГРС)

1. ГРС — это исходная проблема или цель, которая находится на Ярусе 0. Оно всегда имеет вес 100% и нормированный вес 1.0000.

2. Декомпозиция на квазипростые свойства

Каждое родительское свойство разбивается на 2–6 квазипростых свойств. Это обеспечивает баланс между детализацией и управляемостью дерева.

3.Назначение весов свойствам

Веса назначаются по убывающей шкале, где максимальный вес (100%) ОБЯЗАТЕЛЬНО присваивается наиболее важному квазипростому свойству. Остальным квазипростым свойствам присваиваются веса меньше 100% в зависимости от их влияние на родительское свойство.

4. Нормирование весов

Веса каждого квазипростого свойства нормируются путем вычисления нормированного веса в долях единицы до 4 знаков после запятой путём деления на сумму весов всех квазипростых свойств на данном ярусе. Это обеспечивает согласованность дерева.

5. Расчёт Ярусного нормированного коэффициента (Я.Н.К.) - производится при достижении разложения до простого свойства, которое можно измерить

Я.Н.К. для каждого простого свойства рассчитывается как произведение нормированных весов всех родительских свойств в цепочке от простого свойства, родительских свойств и до ГРС.

6. Контроль суммы Я.Н.К.

Сумма Я.Н.К. всех простых свойств должна быть равна 1.0000 ± 0.0001. Это гарантирует полноту и корректность дерева.

7.  Остановка декомпозиции на простых свойствах

Декомпозиция прекращается, когда достигается уровень простых свойств — измеримых показателей, которые можно количественно оценить.

8. Использование экспертных оценок

Для назначения весов и проверки корректности дерева привлекаются эксперты, обладающие знаниями в предметной области.

9. Документирование изменений

Все изменения в дереве свойств фиксируются с указанием даты и причины корректировки. Это обеспечивает прозрачность и отслеживаемость процесса.

10. Проверка на полноту и непротиворечивость

Дерево должно охватывать все аспекты исследуемой проблемы и не содержать противоречий между свойствами на разных ярусах:

10.1. Охват всех ключевых аспектов

Дерево свойств должно включать все значимые аспекты исследуемой проблемы, такие как функциональность, надёжность, удобство использования, стоимость и другие. Например, для CRM-системы это может включать не только её функциональные возможности, но и удобство интерфейса, скорость работы, стоимость обслуживания и другие важные характеристики.

10.2. Исключение противоречий

На всех уровнях дерева необходимо исключить противоречия между свойствами. Например, если одно свойство подразумевает высокую стоимость, а другое — низкую, это требует согласования и уточнения. Противоречия могут возникать и между свойствами разных уровней, поэтому важно проверять их взаимосвязь и логическую согласованность.

10.3. Проверка на полноту

Дерево должно быть полным, т.е. охватывать все необходимые свойства для решения поставленной задачи. Это включает как свойства назначения объекта, так и его функциональные, эксплуатационные и другие характеристики. Например, для палатки это может включать защиту от влаги, прочность материала, удобство установки и другие важные аспекты.

10.4. Учёт всех аспектов проблемы

Дерево свойств должно учитывать все ключевые аспекты исследуемой проблемы. Это включает как свойства назначения объекта, так и его функциональные, эксплуатационные и другие характеристики. Например, если объект — это CRM-система, дерево должно учитывать не только её функциональность, но и удобство использования, надёжность, стоимость обслуживания и другие важные аспекты.

10.5. Исключение противоречий

На всех ярусах дерева необходимо исключить противоречия между свойствами. Например, если одно свойство подразумевает высокую стоимость, а другое — низкую, это требует согласования и уточнения. Противоречия могут возникать и между свойствами разных ярусов, поэтому важно проверять их взаимосвязь и логическую согласованность.

Эти правила обеспечивают системный подход к построению деревьев свойств и их использованию для решения многокритериальных задач".

Всегда включай все пункты и подпункты правил, включая 10.1, 10.2 и так далее.

 2. Сейчас нам надо декомпозировать сложное интегральное свойство, которое находится на Ярусе 0 и не имеет кодировки, определенное в названии проблемы.

Для уточнения контекста задачи перед декомпозицией: Уточнить контекст задачи и приоритетные аспекты перед началом декомпозиции интегрального свойства, чтобы избежать расхождений в обосновании весов.

Шаг 1: Запросите у пользователя контекст задачи.

Пример вопроса:

"Пожалуйста, уточните, какой аспект является приоритетным для задачи: экономический, экологический, социальный или другой? Это поможет правильно определить ключевые факторы для декомпозиции."

Шаг 2: Предложите варианты декомпозиции на основе уточнённого контекста.

Пример: "Если приоритетным является экономический аспект, ключевым фактором будет экономическая привлекательность. Если экологический — экологическая безопасность. Выберите подходящий вариант или предложите свой."

Шаг 3: Зафиксируйте выбранный подход.

Пример: "Выбранный подход: экономическая привлекательность как ключевой фактор. Дата фиксации: 2025-04-02."

Проверка данных: Убедитесь, что контекст задачи и приоритетные аспекты согласованы с пользователем.

Проверьте, что выбранный подход зафиксирован и используется для всех последующих шагов.

Формат вывода:

Уточнённый контекст задачи.

Выбранный подход к декомпозиции.

Дата фиксации подхода.

Пример использования:

Введите контекст задачи: "Оценка территории для инвестиций."

Уточните приоритетный аспект: "Экономический."

Выберите подход: "Экономическая привлекательность как ключевой фактор."

Зафиксируйте подход: "Выбранный подход зафиксирован. Дата: 2025-04-02."

Сообщения об ошибках:

Ошибка 1: "Контекст задачи не уточнён. Пожалуйста, уточните приоритетный аспект."

Ошибка 2: "Выбранный подход не зафиксирован. Пожалуйста, зафиксируйте подход перед продолжением."

Рекомендации: выбранный контекст всегда учитывай перед началом декомпозиции.

Фиксируйте выбранный подход и используйте его для всех последующих шагов.

Если контекст задачи изменяется, создайте новую декомпозицию на основе обновлённых данных.

Далее предложи "на сколько квазипростых свойств надо декомпозировать интегральное свойство" и представь пользователю на утверждение.  и после  ответа произведи разложение и присвой свойству код (для первого яруса, например, 1.1 и 1.2 для разложения на 2 квазипростых свойства) и, после согласования с пользователем, веса - с наибольшим влиянием значение 100%, а другим меньшее значение с учетом степени их влияния. После выставления весов дай обязательно объяснение, почему ты назначил такие веса - обоснуй.  Каждое свойства должно быть пронумеровано в зависимости от яруса и текущего разложения свойств. Затем каждое из полученных свойств надо разложить еще по определенной выше процедуре и так продолжить до достижения простых свойств, которые можно измерить. Каждый раз спрашивай на сколько свойств надо разложить. Должно быть не более 6 ярусов разложения. Обязательное правило, что наибольшему влиянию надо присвоить 100% (не сумма, а 100% присваивается свойству, оказывающего наибольшее влияние на интегральный показатель), а остальным меньшее значение, в зависимости от степени влияния, например, 80%, 70%, 65% и так далее.  Процесс должен быть интерактивным, то есть после каждого этапа декомпозиции на определенном ярусе необходимо представить разложение родительского свойства на квазипростые свойства и дать им веса в процентах и спросить удовлетворяет ли это разложение и веса заказчика исследования.

Назначение весов для каждого родительского свойства необходимо согласовывать с пользователем. Ты предлагаешь веса и обосновываешь их, а пользователь или соглашается или просит внести корректировки. Только после полного согласия переходишь к следующему свойству.

После ответа нужно определить нормированное значение веса квазипростого свойства путем деления веса на сумму весов всех квазипростых свойств родительского свойства и выдать результат не в %, а в долях единицы до 4 знаков после запятой. Надо провести эти расчеты и показать их исследователю. После одобрения продолжить исследование на следующем ярусе.

Обязательно учитывай ветку 1.2 и её подветки при декомпозиции. Убедись, что все ветки дерева свойств обрабатываются последовательно и без пропусков.

При декомпозиции ветки 1.2 и последующих веток дерева свойств, обязательно включай в таблицу уже утверждённую ветку 1.1 с её полной декомпозицией. Убедись, что все свойства ветки 1.1 сохраняются в таблице без изменений, а новые свойства добавляются в соответствии с правилами декомпозиции. После каждого этапа декомпозиции обязательно показывай обновлённую таблицу, включая все ранее утверждённые свойства.

После завершения процесса необходимо представить

1.  Надо провести проверку суммирую все Я.Н.К. и проверить, равна ли сумма 1.0000 ± 0.01. Если не равна, то перепроверь все расчёты Я.Н.К. и найди ошибки. Для этого поэтапно проверь каждое простое свойство и его цепочку нормированных весов. Общий подход:

Для каждого простого свойства проверь цепочку нормированных весов от него до ГРС.

Перемножь нормированные веса в цепочке и получи Я.Н.К.

Проверка и исправление ошибок с нормированными весами

Цель: Обеспечить корректное использование нормированных весов при построении дерева свойств и расчете Я.Н.К.

Шаги выполнения: Проверка нормированных весов:

Если нормированный вес равен 1,0000, это указывает на ошибку, так как это возможно только для ГРС (Ярус 0).

Для всех других ярусов нормированный вес должен быть меньше 1,0000, а сумма нормированных весов всех квазипростых свойств родительского свойства должна быть равна 1,0000.

Исправление ошибок: Если обнаружен нормированный вес, равный 1,0000, пересчитайте его по формуле:

Убедитесь, что сумма нормированных весов всех квазипростых свойств родительского свойства равна 1,0000.

Пересчет Я.Н.К.:

После исправления нормированных весов пересчитайте Я.Н.К. для всех простых свойств, используя цепочку нормированных весов от простого свойства до ГРС.

Проверка суммы Я.Н.К.:  Убедитесь, что сумма Я.Н.К. всех простых свойств равна 1,0000 ± 0,01.

Пример использования: Убедитесь, что итоговая таблица с весами и Я.Н.К. зафиксирована и не может быть изменена.

Перед построением дерева свойств проверьте, что все нормированные веса и Я.Н.К. соответствуют правилам.

Документирование: Если требуется внести изменения, создайте новую таблицу и обновите дерево свойств.

Суммируй все Я.Н.К. и проверь, равна ли сумма 1.0000 ± 0.01.

Если сумма не совпадает, ищи  ошибки в расчётах или данных. Если точность не достигается, то выведи все расчеты в удобную таблицу для проверки в EXCEL - во всех вычисленных значениях, кроме кода, поставь вместо точки запятую.

2.  При работе с деревом свойств строго соблюдай следующие правила:

Не изменяй названия свойств: Все наименования свойств должны оставаться неизменными, как они были согласованы и предоставлены пользователем.

Сверяй данные: Перед внесением изменений или добавлением новых свойств сверяй их с уже согласованными данными.

Фиксируй изменения: Если пользователь вносит изменения, сохраняй их в отдельном разделе или таблице с указанием даты и причины корректировки.

Проверка на конфликты: Если обнаруживается расхождение между текущими и сохранёнными данными, выводи сообщение с указанием конфликта и запрашивай подтверждение на внесение изменений.

Документирование: Все изменения и обновления фиксируй в таблице с указанием:

Ярус

Код свойства

Название свойства

Вес (%)

Нормированный вес

Я.Н.К.

Статус свойства

Дата изменения

Итоговая проверка: После завершения работы проверь, что все данные соответствуют согласованным значениям, и выведи итоговую таблицу для подтверждения пользователем.

Пример использования промта

Если пользователь предоставляет таблицу:

Ярус Код свойства Название свойства Вес (%) Нормированный вес Я.Н.К. Статус свойства

0 1 Эффективность франчайзинга 100 1.0000 - родительское

1 1.1 Полученные результаты 100 0.6250 - родительское

1 1.2 Обобщенная характеристика затрат 60 0.3750 - родительское

И затем добавляет новое свойство:

Ярус Код свойства Название свойства Вес (%) Нормированный вес Я.Н.К. Статус свойства

2 1.1.1 Оргработа по франшизам 100 0.6711 - родительское

Промт гарантирует, что:

Данные должны быть сверены с уже согласованными значениями.

Изменения должны быть зафиксированы и документированы.

Фиксация данных: Убедитесь, что итоговая таблица зафиксирована и не может быть изменена.

Проверка: Перед построением дерева свойств проверьте, что все веса и Я.Н.К. соответствуют таблице.

Документирование: Если требуется внести изменения, создайте новую таблицу и обновите структуру дерева свойств.

3. Если точность достигнута, то выведи итоговые результаты в виде читаемой таблицы с границами, столбцами и строками. В первом столбце указать Ярус, во втором, номер свойства в третьем- название свойства, в третьем вес в процентах, в четвертом - нормированное значение веса.

После каждого подтверждения заказчиком:

Сохраняй таблицу в формате:

Ярус Код свойства Название свойства Вес (%) Нормированный вес Я.Н.К.    Статус свойства

Пример

0 1 Эффективность системы управления 100         1.0000

1 1.1 Управление франчайзи                        100        0.6667                        -         родительское

1 1.2 Финансовая устойчивость                50       0.3333                    0,0076    простое

Форматирование:

Границы таблиц: | и --- для разделителей.

Выравнивание: тексты — по левому краю, числа — по правому.

Перед внесением изменений:

Сверяй новые параметры с сохранёнными данными.

Пример конфликта:

Обнаружено расхождение:

* Текущий параметр: 1.1.1.2.1 — "Число франчайзи" (Вес: 80%)

* Сохранённый параметр: 1.1.1.2.1 — "Число расторгнутых франшиз" (Вес: 90%)

Сохранить текущие параметры? (Да/Нет)

В финальной таблице:

Выделяй изменения цветом. Пример:

Код свойства Название (изменено) Вес (%) (изменено)

1.1.1.2.1 <span style="color:red">Число расторгнутых франшиз</span> <span style="color:red">90</span>

Пример сохранённых данных

Ярус Код свойства Название свойства Вес (%) Нормированный вес Дата п

2         1.1.1  Качество поддержки франчайзи 100 0.5556 2025-03-23

2 1.1.2 Контроль выполнения обязательств 80 0.4444 2025-03-23

3 1.1.1.1 Обучение франчайзи 100 0.6250 2025-03-23

3 1.1.1.2 Мониторинг обратной связи 60 0.3750 2025-03-23.

Промт для сохранения итоговой таблицы

Фиксация таблицы:

Итоговая таблица сохраняется в памяти как неизменяемый объект.

Все данные таблицы (ярусы, коды свойств, названия, веса, нормированные веса, Я.Н.К. и статусы) фиксируются в текущем состоянии.

Запрет изменений:

Любые попытки изменить данные таблицы будут отклоняться.

Если пользователь запрашивает изменения, система должна выводить сообщение:

"Итоговая таблица зафиксирована и не может быть изменена. Если требуется внести изменения, создайте новую таблицу."

Доступ к таблице:

Пользователь может запросить вывод таблицы в любой момент.

Таблица выводится в формате, указанном пользователем (например, с разделителями | и --- для границ).

Проверка целостности:

Перед фиксацией таблицы система проверяет, что сумма Я.Н.К. равна 1,0000 ± 0,01.

Если точность не соблюдена, система выводит сообщение:

"Сумма Я.Н.К. не равна 1,0000. Пожалуйста, проверьте данные перед фиксацией таблицы."

 Кроме итоговой таблицы необходимо создать еще одну таблица только с простыми свойствами. Колонки: "Номер по порядку, Код, Наименование, Я.Н.К., Я.Н.К. в процентах." . Перед выводом итоговой таблицы и усеченной таблицы после каждого кода надо поставить точку. Разделить числа в Я.Н.К. во всех таблицах и Я.Н.К. в процентах заменить вместо точки на запятую. Выводить в EXCEL надо эти две таблицы.

Далее спроси пользователя; " Нужно ли преобразовать итоговую таблицу в структуру MindMap?   да/нет". Если ответ да, то: "1. **Цель:**

   Преобразовать итоговую таблицу свойств в структуру MindMap с полным разложением всех веток и проверкой корректности данных.

2. **Шаги выполнения:**

   - **Шаг 1:** Импортируйте итоговую таблицу в формате CSV или Excel.

   - **Шаг 2:** Постройте иерархическую структуру MindMap, начиная с корневого узла (Ярус 0).

   - **Шаг 3:** Для каждого яруса:

     - Добавьте свойства в соответствии с их кодами и весами.

     - Убедитесь, что все ветки разложены до простых свойств.

   - **Шаг 4:** Проверьте корректность данных:

     - Сумма нормированных весов на каждом ярусе должна быть равна 1.0000 ± 0.01.

     - Сумма Я.Н.К. всех простых свойств должна быть равна 1.0000 ± 0.01.

   - **Шаг 5:** Визуализируйте структуру MindMap с использованием инструментов (например, MindMeister, XMind, Coggle).

3. **Проверка данных:**

   - Для каждого простого свойства проверьте цепочку нормированных весов от него до корневого узла.

   - Перемножьте нормированные веса в цепочке и получите Я.Н.К.

   - Суммируйте все Я.Н.К. и убедитесь, что сумма равна 1.0000 ± 0.01.

4. **Формат вывода:**

   - Структура MindMap в текстовом формате с отступами и символами `├──`, `└──`.

   - Таблица с проверкой данных (Ярус, Код свойства, Название свойства, Вес (%), Нормированный вес, Я.Н.К.).

5. **Пример использования:**

   - Введите итоговую таблицу в формате CSV или Excel.

   - Запустите процесс разложения и проверки данных.

   - Получите структуру MindMap и таблицу с проверкой.

Промт для предотвращения ошибок с весами:

Цель:

Обеспечить корректное использование весов из итоговой таблицы при построении структуры MindMap.

Шаги выполнения:

Шаг 1: Перед началом работы убедись, что итоговая таблица с весами и Я.Н.К. зафиксирована и не может быть изменена.

Шаг 2: При построении MindMap строго используй веса и Я.Н.К. из итоговой таблицы. Не пересчитывай их самостоятельно.

Шаг 3: Проверь, что все свойства и их веса соответствуют данным из таблицы.

Шаг 4: Убедись, что сумма Я.Н.К. всех простых свойств равна 1,0000 ± 0,01.

Шаг 5: Если обнаружено несоответствие, останови процесс и сообщи об ошибке.

Контрольные точки:

Контрольная точка 1: Веса всех свойств должны строго соответствовать итоговой таблице.

Контрольная точка 2: Сумма Я.Н.К. всех простых свойств должна быть равна 1,0000 ± 0,01.

Контрольная точка 3: Если итоговая таблица изменена, создай новую структуру MindMap на основе обновленных данных.

Пример использования:

Введите итоговую таблицу в формате CSV или Excel.

Запустите процесс построения MindMap, строго следуя данным из таблицы.

Проверьте, что все веса и Я.Н.К. соответствуют таблице.

Сообщения об ошибках:

Ошибка 1: "Обнаружено несоответствие весов. Пожалуйста, проверьте данные в итоговой таблице."

Ошибка 2: "Сумма Я.Н.К. не равна 1,0000. Пожалуйста, проверьте данные перед фиксацией таблицы."

Рекомендации:

Фиксация данных: Убедись, что итоговая таблица зафиксирована и не может быть изменена.

Проверка: Перед построением MindMap проверь, что все веса и Я.Н.К. соответствуют таблице.

Документирование: Если требуется внести изменения, создай новую таблицу и обнови структуру MindMap.
